# Supplementary material for: Computation of entropy values for non-electrolyte solute molecules in solution based on semi-empirical corrections to a polarized continuum model
Source: Royal Society of Chemistry journal article supplement (doi:10.1039/d2cp04972d), 2023-01-01
Supplement: d2cp04972d2.zip [file d2cp04972d2.zip]

## Sheet: Examples
ethanol in benzene		Inputs				cyclohexane in benzene		Inputs
		outputs						outputs
constants						constants
the Planck constant	h	6.62607e-34	m^2 kg / s			the Planck constant	h	6.62607e-34	m^2 kg / s
the Boltzman constant	kb	1.38065e-23	m^2 kg / (s^2 K)			the Boltzman constant	kb	1.38065e-23	m^2 kg / (s^2 K)
the universal gas constant	R	8.31446	m^2 kg / (s^2 K mol)			the universal gas constant	R	8.31446	m^2 kg / (s^2 K mol)
pi	π	3.14159				pi	π	3.14159
the Avogadro number	NA	6.02214e+23	mol^-1			the Avogadro number	NA	6.02214e+23	mol^-1
electron multiplicity		1				electron multiplicity		1
molar mass	m	46.0419	g/mol			molar mass	m	84.0939	g/mol
temperature	T	298.15	K			temperature	T	298.15	K
concentration	C	1	mol/L			concentration	C	1	mol/L
Volume of cavity	Vcav	109.242	A^3			Volume of cavity	Vcav	185.077	A^3
Volume of a molecule	Vmol	74.642	A^3			Volume of a molecule	Vmol	134.976	A^3
V free	Vfree	1.8514e-31	m^3			V free	Vfree	1.84401e-31	m^3
Ncell	Ncell	9.15399e+24				Ncell	Ncell	5.40316e+24
Nsolute	Nsolute	6.02214e+23				Nsolute	Nsolute	6.02214e+23
rotational symmetry No.	σ	1	-			rotational symmetry No.	σ	6	-
Rotational temp. A	θA	1.69964	K			Rotational temp. A	θA	0.2073	K
Rotational temp. B	θB	0.44945	K			Rotational temp. B	θB	0.20729	K
Rotational temp. C	θC	0.39185	K			Rotational temp. C	θC	0.11842	K
Dipole moment of solute	m	1.91835	debye
Dipole moment of solute at vacuum	m_p	1.77079	debye			Electronic entropy	Selec	0
Polarizability	P	33.114	-
Electric field in cavity	Ef	9.01512e+08	J / (m C)			Translational entropy	S trans	61.725	J / (mol K)
	X	2.80279
						Rotational entropy	S rot	95.345	J / (mol K)
Electronic entropy	Selec	0
						Vibrational entropy	Svib	40.5681	J / (mol K)
Translational entropy	S trans	54.2459	J / (mol K)
						S conformer	Sconformer	0	J / (mol K)
Rotational entropy	S rot	91.0246	J / (mol K)
						Configuration entropy	S configuration	26.0758	J / (mol K)
Vibrational entropy	Svib	22.3844	J / (mol K)
						total entropy	Stot	223.714	J / (mol K)
S conformer	Sconformer	9.1337	J / (mol K)
Configuration entropy	S configuration	30.6612	J / (mol K)
total entropy	Stot	207.45	J / (mol K)

## Sheet: non-linear polar molecules
non-linear polar molecules		Inputs
		outputs
constants
the Planck constant	h	6.62607e-34	m^2 kg / s
the Boltzman constant	kb	1.38065e-23	m^2 kg / (s^2 K)
the universal gas constant	R	8.31446	m^2 kg / (s^2 K mol)
pi	π	3.14159
the Avogadro number	NA	6.02214e+23	mol^-1
electron multiplicity			-
molar mass	m		g/mol
temperature	T		K
concentration	C		mol/L
Volume of cavity	Vcav		A^3
Volume of a molecule	Vmol		A^3
V free	Vfree	0	m^3
Ncell	Ncell	#DIV/0!
Nsolute	Nsolute	0
rotational symmetry No.	σ		-
Rotational temp. A	θA		K
Rotational temp. B	θB		K
Rotational temp. C	θC		K
Dipole moment of solute	m		debye
Dipole moment of solute at vacuum	m_p		debye
Polarizability	P		-
Electric field in cavity	Ef	#DIV/0!	J / (m C)
	X	#DIV/0!
Electronic entropy	Selec	#NUM!
Translational entropy	S trans	#NUM!	J / (mol K)
Rotational entropy	S rot	#DIV/0!	J / (mol K)
Vibrational entropy	Svib		J / (mol K)
S conformer	Sconformer		J / (mol K)
Configuration entropy	S configuration	#DIV/0!	J / (mol K)
total entropy	Stot	#NUM!	J / (mol K)

## Sheet: non-linear non-polar molecules
non-linear non-polar molecules		Inputs
		outputs
constants
the Planck constant	h	6.62607e-34	m^2 kg / s
the Boltzman constant	kb	1.38065e-23	m^2 kg / (s^2 K)
the universal gas constant	R	8.31446	m^2 kg / (s^2 K mol)
pi	π	3.14159
the Avogadro number	NA	6.02214e+23	mol^-1
electron multiplicity			-
molar mass	m		g/mol
temperature	T		K
concentration	C		mol/L
Volume of cavity	Vcav		A^3
Volume of a molecule	Vmol		A^3
V free	Vfree	0	m^3
Ncell	Ncell	#DIV/0!
Nsolute	Nsolute	0
rotational symmetry No.	σ		-
Rotational temp. A	θA		K
Rotational temp. B	θB		K
Rotational temp. C	θC		K
Electronic entropy	Selec	#NUM!
Translational entropy	S trans	#NUM!	J / (mol K)
Rotational entropy	S rot	#DIV/0!	J / (mol K)
Vibrational entropy	Svib		J / (mol K)
S conformer	Sconformer		J / (mol K)
Configuration entropy	S configuration	#DIV/0!	J / (mol K)
total entropy	Stot	#NUM!	J / (mol K)

## Sheet: inear polar molecules
linear polar molecules		Inputs
		outputs
constants
the Planck constant	h	6.62607e-34	m^2 kg / s
the Boltzman constant	kb	1.38065e-23	m^2 kg / (s^2 K)
the universal gas constant	R	8.31446	m^2 kg / (s^2 K mol)
pi	π	3.14159
the Avogadro number	NA	6.02214e+23	mol^-1
electron multiplicity			-
molar mass	m		g/mol
temperature	T		K
concentration	C		mol/L
Volume of cavity	Vcav		A^3
Volume of a molecule	Vmol		A^3
V free	Vfree	0	m^3
Ncell	Ncell	#DIV/0!
Nsolute	Nsolute	0
rotational symmetry No.	σ		-
Rotational temp. A	θA		K
Dipole moment of solute	m		debye
Dipole moment of solute at vacuum	m_p		debye
Polarizability	P		-
Electric field in cavity	Ef	#DIV/0!	J / (m C)
	X	#DIV/0!
Electronic entropy	Selec	#NUM!
Translational entropy	S trans	#NUM!	J / (mol K)
Rotational entropy	S rot	#DIV/0!	J / (mol K)
Vibrational entropy	Svib		J / (mol K)
S conformer	Sconformer		J / (mol K)
Configuration entropy	S configuration	#DIV/0!	J / (mol K)
total entropy	Stot	#NUM!	J / (mol K)

## Sheet: linear non-polar molecules
non-linear non-polar molecules		Inputs
		outputs
constants
the Planck constant	h	6.62607e-34	m^2 kg / s
the Boltzman constant	kb	1.38065e-23	m^2 kg / (s^2 K)
the universal gas constant	R	8.31446	m^2 kg / (s^2 K mol)
pi	π	3.14159
the Avogadro number	NA	6.02214e+23	mol^-1
electron multiplicity			-
molar mass	m		g/mol
temperature	T		K
concentration	C		mol/L
Volume of cavity	Vcav		A^3
Volume of a molecule	Vmol		A^3
V free	Vfree	0	m^3
Ncell	Ncell	#DIV/0!
Nsolute	Nsolute	0
rotational symmetry No.	σ		-
Rotational temp. A	θA		K
Electronic entropy	Selec	#NUM!
Translational entropy	S trans	#NUM!	J / (mol K)
Rotational entropy	S rot	#DIV/0!	J / (mol K)
Vibrational entropy	Svib		J / (mol K)
S conformer	Sconformer		J / (mol K)
Configuration entropy	S configuration	#DIV/0!	J / (mol K)
total entropy	Stot	#NUM!	J / (mol K)
